# Supplementary material
Source: publisher figshare collection journal article supplement (https://tandf.figshare.com/ndownloader/files/26077959)
Supplement: Supplementary file 1 [file 26077959]

# Appendix A: Events shown in the videos

Items marked with asterisk were created and used in Sakarias & Flecken (2019). The whole collection of their stimuli can be found in the following link: <https://osf.io/uyxtg/>

| **Change of state events** | |  | **No change of state events** | |  | **Filler events** | |
| --- | --- | --- | --- | --- | --- | --- | --- |
| A01* | Break chocolate in pieces |  | B01* | Whisk milk |  | F01* | Stretch |
| A02* | Build a Lego tower |  | B02* | Rub a knife with a cloth |  | F02* | Yawn |
| A03* | Cut an apple in half |  | B03* | Rub glasses with a cloth |  | F03* | Blow one's nose |
| A04* | Cut paper in half |  | B04* | Wipe a mirror |  | F04* | Sleep |
| A05* | Peel a banana |  | B05* | Measure a box |  | F05* | Calculate |
| A06* | Peel a mandarin |  | B06* | Shuffle cards |  | F06* | Do one’s hair |
| A07* | Make a jigsaw puzzle |  | B07* | Wipe an empty glass |  | F07* | Give a book to someone |
| A08* | Roll wool into a ball |  | B08* | Staple papers |  | F08* | Throw a ball to someone |
| A09* | Tear paper in half |  | B09* | Stir soup with a spoon |  | F09* | Slap someone |
| A10 | Fill a glass with juice |  | B10* | Wipe a table |  | F10* | Dance with someone |
| A11 | Cut pieces of paper |  | B11* | Spread chocolate on bread |  | F11* | Shake hands with someone |
| A12 | Drink up wine |  | B12* | Put salt in a bowl |  | F12* | Bandage someone |

Events shown in the videos during the practice trials

| Practice events | |
| --- | --- |
| P01 | Put a hat on someone |
| P02 | Give papers to someone |
| P03 | Put a book on a table |
| P04 | Put a book on the head |
| P05 | Juggle two tangerines |
| P06 | Play with a toy car |

# Appendix B: Accuracy by recognition cue type

Performance of participants in Experiment 1 and 2 by cue type (matching / mismatching) shown during the recognition test. Low performance in both cue types may reflect a weak representation in memory, whereas high performance in both cue types may reflect a strong memory representation. In addition,a good performance in the case of one cue type but not in the other type may reflect weak-strong representations in memory.

| **Recognition accuracy by cue type in Experiment 1 (non-verbal encoding)** | | | | |
| --- | --- | --- | --- | --- |
| Event type | Mov. Dynamics | Language Group | Recognition cue type | |
| Matching | Mismatching |
| Change of state | Ceased action | Spanish | 68.3% | 76.7% |
| Mandarin | 46.0% | 74.6% |
| Ongoing action | Spanish | 36.7% | 58.3% |
| Mandarin | 44.4% | 57.1% |
| No change of state | Ceased action | Spanish | 30.0% | 63.3% |
| Mandarin | 38.1% | 68.3% |
| Ongoing action | Spanish | 53.3% | 66.7% |
| Mandarin | 31.7% | 73.0% |

| **Recognition accuracy by cue type in Experiment 2 (verbal encoding)** | | | | |
| --- | --- | --- | --- | --- |
| Event type | Mov. Dynamics | Language Group | Recognition cue type | |
| Matching | Mismatching |
| Change of state | Ceased action | Spanish | 83.1% | 77.3% |
| Mandarin | 75.4% | 77.8% |
| Ongoing action | Spanish | 56.9% | 60.9% |
| Mandarin | 54.8% | 38.7% |
| No change of state | Ceased action | Spanish | 51.5% | 75.8% |
| Mandarin | 53.2% | 71.0% |
| Ongoing action | Spanish | 57.6% | 74.2% |
| Mandarin | 48.3% | 69.8% |

# 
